# Supplementary material
Source: PubMed Central journal article supplement (PMC2265144)
Supplement: pnas_0709811105_3.pdf [file pnas_0709811105_3.pdf]

**Table 2. Morphological measurements, visual, nectar and scent characteristics of *D. wrightii* and *A. palmeri* flowers**

| <b>Flower character</b>                         | <b><i>D. wrightii</i></b> | <b><i>A. palmeri</i></b> |
|-------------------------------------------------|---------------------------|--------------------------|
| Morphology                                      |                           |                          |
| Flower length, cm                               | 19.13 (0.52)              | 2.43 (0.05)              |
| Flower diameter, cm                             | 10.22 (0.34)              | 1.45 (0.02)              |
| Flower weight, g                                | 5.58 (0.13)               | 1.47 (0.13)              |
| Visual                                          |                           |                          |
| Reflectance (%) at 510 nm                       | 52.40 (2.63)              | 23.50 (2.19)             |
| Receptor excitation, UV                         | 0.05 (0.01)               | 0.08 (0.01)              |
| Receptor excitation, blue                       | 0.45 (0.01)               | 0.22 (0.03)              |
| Receptor excitation, green                      | 0.45 (0.01)               | 0.24 (0.02)              |
| Relative floral brightness                      | 0.95 (0.09)               | 0.55 (0.21)              |
| Gustatory                                       |                           |                          |
| Sucrose:hexose sugar ratio                      | 2.66 (0.08)               | 0.001 (0.0002)           |
| Standing crop (ml per flower)                   | 0.056 (0.008)             | 0.616 (0.140)            |
| Total sugar concentration (g per flower)        | 12.33 (0.63)              | 73.98 (5.45)             |
| Scent                                           |                           |                          |
| Emission rate (ng per flower or umbel per hour) | 92.53 (9.49)              | 83.61 (13.62)            |
| Monoterpenes, %                                 | 72.32 (2.15)              | 38.1 (4.97)              |
| Sequiterpenes, %                                | 6.6 (0.40)                | NA                       |
| Aromatics, %                                    | 30.56 (1.88)              | 8.20 (2.41)              |
| Esters, %                                       | NA                        | 52.96 (6.52)             |

Mean  $\pm$  SEM ( $n = 10$  per species) of the floral characteristics used in the PCA.
