# Supplementary material
Source: PubMed Central journal article supplement (PMC2265144)
Supplement: pnas_0709811105_4.pdf [file pnas_0709811105_4.pdf]

**Table 3. Volatile headspace constituents from *Agave palmeri* and *Datura wrightii* identified by GC-MS**

| Peak no. Fig. 2 | Ret. t. (min) | Compound                    | <i>Agave palmeri</i> (%) | <i>Datura wrightii</i> (%) | MW  | Molecular formula                             | notes            | Structure class |
|-----------------|---------------|-----------------------------|--------------------------|----------------------------|-----|-----------------------------------------------|------------------|-----------------|
|                 | 2.77          | Dimethyl disulfide          | <1                       |                            | 94  | C <sub>2</sub> H <sub>6</sub> S <sub>2</sub>  | b, d, e          | Disulfide       |
|                 | 3.52          | 2-hexanone                  |                          | <1                         | 100 | C <sub>6</sub> H <sub>12</sub> O              | d, e             | Ketone          |
| 7               | 5.00          | Ethyl isovalerate           | 3.4                      |                            | 130 | C <sub>7</sub> H <sub>14</sub> O <sub>2</sub> | b, d, e          | Ester           |
| 8               | 6.48          | Xylene                      | 9.7                      |                            | 106 | C <sub>8</sub> H <sub>10</sub>                | d, e, i          | Aromatic        |
|                 | 7.70          | Unk. monoterpene            | <1                       |                            | 136 | C <sub>10</sub> H <sub>16</sub>               |                  | Terpene         |
|                 | 7.88          | A-thujene                   | <1                       |                            | 136 | C <sub>10</sub> H <sub>16</sub>               | d, j             | Terpene         |
| 9               | 8.23          | A-pinene                    | 16.3                     |                            | 136 | C <sub>10</sub> H <sub>16</sub>               | b, d, e          | Terpene         |
|                 | 8.45          | Ethyl tiglate               | <1                       |                            | 128 | C <sub>7</sub> H <sub>12</sub> O <sub>2</sub> | b, d, e          | Ester           |
| 10              | 8.82          | Camphene                    | 11.0                     |                            | 136 | C <sub>10</sub> H <sub>16</sub>               | b, d, e          | Terpene         |
|                 | 9.22          | Benzaldehyde                | <1                       | <1                         | 106 | C <sub>7</sub> H <sub>6</sub> O               | c, d, e, f       | Aromatic        |
|                 | 9.38          | Ethyl hexanoate             | <1                       |                            | 144 | C <sub>8</sub> H <sub>16</sub> O <sub>2</sub> | d                | Ester           |
|                 | 9.57          | Sabinene                    | <1                       | <1                         | 136 | C <sub>10</sub> H <sub>16</sub>               | b, c, d, e, j    | Terpene         |
| 11              | 9.73          | β-pinene                    | 14.8                     |                            | 136 | C <sub>10</sub> H <sub>16</sub>               | b, d, e          | Terpene         |
| 1               | 10.07         | Beta-myrcene                | <1                       | 2.5                        | 136 | C <sub>10</sub> H <sub>16</sub>               | b, c, d, e       | Terpene         |
| 12              | 10.60         | Ethyl hexenoate             | 4.7                      |                            | 142 | C <sub>8</sub> H <sub>14</sub> O <sub>2</sub> | d                | Ester           |
|                 | 10.82         | Methyl sorbate              | <1                       |                            | 126 | C <sub>7</sub> H <sub>10</sub> O <sub>2</sub> | b, d, f          | Ester           |
|                 | 11.03         | Cymene                      | <1                       |                            | 134 | C <sub>10</sub> H <sub>14</sub>               | b, d, e          | Terpene         |
| 13              | 11.18         | Limonene                    | 12.7                     | <1                         | 136 | C <sub>10</sub> H <sub>16</sub>               | b, d, e          | Terpene         |
|                 | 11.21         | Cineol                      |                          | <1                         | 154 | C <sub>10</sub> H <sub>18</sub> O             | c, d             | Terpene         |
| 2               | 11.29         | Benzyl alcohol              |                          | 9.5                        | 109 | C <sub>7</sub> H <sub>8</sub> O               | c, d, e          | Aromatic        |
|                 | 11.57         | Ethyl isohexenoate          | <1                       |                            | 142 | C <sub>8</sub> H <sub>14</sub> O <sub>2</sub> | d                | Ester           |
| 3               | 11.82         | Beta-ocimene                | <1                       | 32.4                       | 136 | C <sub>10</sub> H <sub>16</sub>               | c, e, d, j       | Terpene         |
| 14              | 12.02         | Ethyl sorbate <sup>k</sup>  | 2.0                      |                            | 140 | C <sub>8</sub> H <sub>12</sub> O <sub>2</sub> | b, d, f, h       | Ester           |
|                 | 12.04         | Acetophenone                |                          | <1                         | 120 | C <sub>8</sub> H <sub>8</sub> O               | d, e             | Aromatic        |
|                 | 12.42         | Unk. monoterpene            | <1                       |                            | 136 | C <sub>10</sub> H <sub>16</sub>               |                  | Terpene         |
|                 |               | Methyl benzoate             |                          | 2.6                        | 136 | C <sub>8</sub> H <sub>8</sub> O <sub>2</sub>  | c, d, e, f, g    | Ester           |
| 15              | 12.67         | Ethyl sorbate               | 16.9                     |                            | 140 | C <sub>8</sub> H <sub>12</sub> O <sub>2</sub> | b, d, e          | Ester           |
|                 | 12.74         | Linalool                    |                          | <1                         | 154 | C <sub>10</sub> H <sub>18</sub> O             | c, d, e, f       | Terpene         |
|                 | 12.78         | Ethyl sorbate <sup>k</sup>  | <1                       |                            | 140 | C <sub>8</sub> H <sub>12</sub> O <sub>2</sub> | b, d             | Ester           |
|                 | 12.88         | Nonanal                     |                          | <1                         | 142 | C <sub>9</sub> H <sub>18</sub> O              | c, d, e, f       | Aldehyde        |
|                 | 13.25         | Phenethanol                 | <1                       |                            | 122 | C <sub>8</sub> H <sub>10</sub> O              | c, b, d, e, f    | Aromatic        |
|                 | 14.03         | Propyl sorbate <sup>k</sup> | <1                       |                            | 154 | C <sub>9</sub> H <sub>14</sub> O <sub>2</sub> | b, d, f          | Ester           |
|                 | 14.20         | Ethyl benzoate              | <1                       |                            | 150 | C <sub>9</sub> H <sub>10</sub> O <sub>2</sub> | d, e, f          | Ester           |
|                 | 14.55         | Propyl sorbate <sup>k</sup> | <1                       |                            | 154 | C <sub>9</sub> H <sub>14</sub> O <sub>2</sub> | b, d, f          | Ester           |
| 4               | 14.63         | Methylsalicyclate           |                          | 3.9                        | 152 | C <sub>8</sub> H <sub>8</sub> O <sub>3</sub>  | c, d, e,         | Aromatic        |
|                 | 14.75         | Propyl sorbate              | <1                       |                            | 154 | C <sub>9</sub> H <sub>14</sub> O <sub>2</sub> | b, d, e, f, g, h | Ester           |
|                 | 14.92         | Decanal                     | <1                       |                            | 156 | C <sub>10</sub> H <sub>20</sub> O             | c, d, e          | Aldehyde        |
|                 | 15.38         | Propyl sorbate <sup>k</sup> | <1                       |                            | 154 | C <sub>9</sub> H <sub>14</sub> O <sub>2</sub> | b, d, f          | Ester           |
|                 | 15.36         | Nerol                       |                          | <1                         | 154 | C <sub>10</sub> H <sub>18</sub> O             | c, d, e, f       | Terpene         |

| Peak no. Fig. 2 | Ret. t. (min) | Compound          | <i>Agave palmeri</i> (%) | <i>Datura wrightii</i> (%) | MW  | Molecular formula                              | notes      | Structure class |
|-----------------|---------------|-------------------|--------------------------|----------------------------|-----|------------------------------------------------|------------|-----------------|
|                 | 15.87         | Butyl sorbate     | <1                       |                            | 154 | C <sub>10</sub> H <sub>16</sub> O <sub>2</sub> | d          | Ester           |
| 5               | 15.94         | Geraniol          |                          | 35.5                       | 154 | C <sub>10</sub> H <sub>18</sub> O              | c, d, e, f | Terpene         |
|                 | 16.36         | Geranial          |                          | 1.6                        | 152 | C <sub>10</sub> H <sub>16</sub> O              | c, d, e, f | Terpene         |
|                 | 16.61         | Neral             |                          | 1.1                        | 152 | C <sub>10</sub> H <sub>16</sub> O              | c, d, e    | Terpene         |
|                 | 17.85         | Cycklosativene    | <1                       |                            | 204 | C <sub>15</sub> H <sub>32</sub>                | d          | Terpene         |
|                 | 17.88         | Geranyl acetate   |                          | <1                         | 196 | C <sub>12</sub> H <sub>20</sub> O <sub>2</sub> | c, d, e    | Terpenoid       |
|                 | 18.13         | Benzyl pentanoate | <1                       |                            | 192 | C <sub>12</sub> H <sub>16</sub> O <sub>2</sub> | c, d       | Ester           |
|                 | 18.13         | Tetradecane       |                          | <1                         | 198 | C <sub>14</sub> H <sub>30</sub>                | d, e       | Alkane          |
|                 | 18.83         | Alloaromadendrene | <1                       |                            | 204 | C <sub>15</sub> H <sub>32</sub>                | d          | Sesquiterpene   |
|                 | 19.10         | Pentadecane       | <1                       | <1                         | 212 | C <sub>15</sub> H <sub>32</sub>                | d, e, f    | Alkane          |
| 6               | 19.13         | A-farnesene       |                          | 2.3                        | 204 | C <sub>15</sub> H <sub>24</sub>                | c, d, e, f | Terpene         |
|                 | 19.88         | Hexadecane        | <1                       |                            | 226 | C <sub>16</sub> H <sub>34</sub>                | d, e       | Alkane          |
|                 | 20.55         | Heptadecane       | <1                       |                            | 240 | C <sub>17</sub> H <sub>36</sub>                | d, f       | Alkane          |
|                 | 21.14         | Benzyl benzoate   |                          | <1                         | 212 | C <sub>14</sub> H <sub>12</sub> O <sub>2</sub> | c, d, e, f | Ester           |
|                 | 21.24         | Octadecane        | <1                       |                            | 254 | C <sub>18</sub> H <sub>38</sub>                | d, e, f    | Alkane          |
|                 | 22.00         | Nonadecane        | <1                       |                            | 268 | C <sub>19</sub> H <sub>40</sub>                | d, e, f    | Alkane          |

<sup>a</sup>Compounds are listed in order of GC retention time. Compound numbers shown in the first column correspond with Fig. 2.

<sup>b</sup>Also observed by R. A. Raguso (1).

<sup>c</sup>Also observed by Raguso *et al.* (2).

<sup>d</sup>Determined by comparison to spectra in the National Institute of Standards and Technology (NIST) 1998 spectral library.

<sup>e</sup>Determined by comparison of spectra and retention times with standard samples.

<sup>f</sup>Confirmed by accurate mass measurement (observed mass within 5 mDa of calculated mass).

<sup>g</sup>Standard samples prepared by transesterification reactions under acidic conditions.

<sup>h</sup>Double bond stereochemistry not determined.

<sup>i</sup>Regiochemistry undetermined.

<sup>j</sup>Determined by comparison to retention indices published by Helmig *et al.* (3).

<sup>k</sup>Isomer.

1. Raguso, R. A. (2004) *Ecology* **85**, 1486-1494.
2. Raguso RA, Henzel C, Buchman SL, Nabhan GP (2003) *Int J Plant Sci* 164:877-892.
3. Helmig D, Klinger LF, Guenther A, Vierling L, Geron C, Zimmerman P (1999) *Chemosphere* 38:2163-2187.
