# Supplementary material
Source: PubMed Central journal article supplement (PMC2265144)
Supplement: pnas_0709811105_5.pdf [file pnas_0709811105_5.pdf]

**Table 4. Factor loadings from the floral characters PCA**

| Flower character             | Loading          |                  |
|------------------------------|------------------|------------------|
|                              | Factor 1 (79.5%) | Factor 2 (16.7%) |
| Morphology                   |                  |                  |
| Flower length (cm)           | <b>0.96</b>      | -0.25            |
| Flower diameter (cm)         | <b>0.95</b>      | -0.26            |
| Flower weight (g)            | <b>0.95</b>      | -0.24            |
| Visual                       |                  |                  |
| Reflectance (%) at 510 nm    | <b>0.82</b>      | -0.35            |
| Receptor excitation – UV     | -0.25            | 0.55             |
| Receptor excitation – Blue   | <b>0.94</b>      | 0.30             |
| Receptor excitation – Green  | <b>0.94</b>      | 0.27             |
| Floral brightness            | <b>0.92</b>      | 0.36             |
| Gustatory                    |                  |                  |
| Sucrose:hexose sugar ratio   | <b>0.96</b>      | -0.24            |
| Standing crop (mL per        | <b>-0.92</b>     | 0.22             |
| Total sugar concentration (g | <b>-0.91</b>     | 0.35             |
| Scent                        |                  |                  |
| Emission rate (ng per flower | 0.23             | 0.20             |
| Monoterpenes (%)             | 0.70             | -0.27            |
| Sequiterpenes (%)            | <b>0.92</b>      | -0.25            |
| Aromatics (%)                | <b>0.87</b>      | -0.11            |
| Esters (%)                   | <b>-0.82</b>     | 0.18             |

The first two factors account for 96.2% of the sample variance. Loadings greater than 75% are shown in boldface. Floral morphological characters, reflectance and receptor excitations, sugar ratio, and the terpenoid and aromatic composition of the scent were highly correlated and positively loaded on Factor 1. In contrast, nectar standing crop, sugar concentration and the esters in the headspace were negatively correlated.
