# Supplementary material
Source: PubMed Central journal article supplement (PMC2265144)
Supplement: pnas_0709811105_6.pdf [file pnas_0709811105_6.pdf]

**Table 5. Percentages of time spent feeding, mean ( $\pm$ SEM) number of proboscis extensions into flower corollas, and results from the hypothesis testing ( $G$  test) to determine the significance of floral preference to describe feeding behavior of naïve moths in two-choice experiments (see text and the legend to Fig. 4 for details)**

| Variable                   | Real flowers |             |  |              |             |  | Paper flowers |             |  |              |             |  |              |             |  |              |             |         |
|----------------------------|--------------|-------------|--|--------------|-------------|--|---------------|-------------|--|--------------|-------------|--|--------------|-------------|--|--------------|-------------|---------|
|                            | Experiment 1 |             |  | Experiment 2 |             |  | Experiment 3  |             |  | Experiment 1 |             |  | Experiment 2 |             |  | Experiment 3 |             |         |
|                            | Dat.flower   | Ag.flower   |  | Dat.flower   | Control     |  | Ag.Flower     | Control     |  | Dat.flower   | Ag.flower   |  | Dat.flower   | Control     |  | Dat.flower   | Ag.flower   | Control |
| Time (%)                   | 94           | 6           |  | 94           | 6           |  | 94            | 6           |  | 91           | 9           |  | 84           | 16          |  | 84           | 84          | 16      |
| $G$                        | 92.92*       |             |  | 140.73*      |             |  | 239.96*       |             |  | 113.3*       |             |  | 106.55*      |             |  | 94.75*       |             |         |
| Prob. Ext.<br>( $\pm$ SEM) | 5.05 (0.57)  | 0.47 (0.19) |  | 6.22 (0.54)  | 0.44 (0.24) |  | 3.66 (0.50)   | 0.73 (0.31) |  | 3.0 (0.65)   | 0.38 (0.16) |  | 4.0 (0.73)   | 0.66 (0.14) |  | 2.88 (0.43)  | 0.88 (0.18) |         |
| $G$                        | 75.59*       |             |  | 53.79*       |             |  | 32.02*        |             |  | 29.84*       |             |  | 31.7*        |             |  | 20.06*       |             |         |

\* $P < 0.001$ ; an asterisk denotes a significant deviation from random in the time spent feeding from one flower or the number of proboscis extensions into the flower's corolla ( $G$  test,  $n = 20$  per treatment).
