# Supplementary material
Source: PubMed Central journal article supplement (PMC2265144)
Supplement: pnas_0709811105_7.pdf [file pnas_0709811105_7.pdf]

**Table 6. Percentages of time spent feeding, mean ( $\pm$  SEM) number of proboscis extensions into flower corollas, and results from the hypothesis-testing ( $G$  test) to determine the significance of floral preference to describe feeding behavior of experienced moths during two-choice experiments (see the text and the legend to Fig. 5 for details)**

| Variable         | Real flowers |            |             | Paper flowers |             |             |             |             |             |
|------------------|--------------|------------|-------------|---------------|-------------|-------------|-------------|-------------|-------------|
|                  | Agave        |            | Control     | Agave         |             | Control     |             |             |             |
|                  | Dat.flower   | Ag.flower  |             | Dat.flower    | Ag.flower   |             |             |             |             |
| Time (%)         | 47           | 53         | 83          | 49            | 51          | 84          | 16          | 76          | 24          |
| $G$              | 1.31         |            | 354.98**    | 0.03          |             | 132.03**    |             | 93.96**     |             |
| Prob.            |              |            |             |               |             |             |             |             |             |
| Ext.( $\pm$ SEM) | 3.13 (0.39)  | 2.1 (0.29) | 4.56 (0.53) | 3.63 (0.66)   | 2.86 (0.44) | 2.96 (0.43) | 0.76 (0.19) | 3.03 (0.40) | 0.83 (0.21) |
| $G$              | 6.16*        |            | 153.58**    | 2.71          |             | 41.53**     |             | 39.9**      |             |

\* $P < 0.05$ ; \*\* $P < 0.001$ ; an asterisk denotes a significant deviation from random in the time spent feeding from one flower or the number of proboscis extensions into the flower's corolla ( $G$  test,  $n = 30$  per treatment).
